# Supplementary material
Source: PubMed Central journal article supplement (PMC3563416)
Supplement: 97320630009049S1.pdf [file 97320630009049S1.pdf]

## Supplementary material:

**Table 1:** Genotype distribution of the polymorphisms examined in this study

| GENE           | SNP       | rs no     | FORWARD PRIMER               | REVERSE PRIMER                  | FRAGMENT | ANNEALING TEMP |
|----------------|-----------|-----------|------------------------------|---------------------------------|----------|----------------|
| ACE            | INTRON 16 | rs4646994 | CTGGAGACCACTC<br>CCATCCTTTCT | GATGTGGCCATCA<br>CATTTCGTCACGAT | 490bp    | 59°C           |
| $\alpha_2B$ AR | EXON 1    | rs4426564 | AGGGTGTTTGTGG<br>GGCATCT     | CAAGCTGAGGCCG<br>GAGACACT       | 112bp    | 57°C           |

**Table 2:** G6PD Individual and percentages of their blood groups

| Blood Group | Positive    | Negative   |
|-------------|-------------|------------|
| A           | 10 (25.65%) | 01 (2.56%) |
| B           | 04 (10.25%) | 01 (2.56%) |
| AB          | 00 (0%)     | 00 (0%)    |
| O           | 22 (56.41%) | 01 (2.56%) |

**Table 3:** Genotype and allele frequency of ACE and  $\alpha_2B$ AR

| Genotypes and Alleles | ACE Cases (n=39) | ACE Controls (n=22) | $\alpha_2B$ AR Cases (n=39) | $\alpha_2B$ AR Controls (n=22) |
|-----------------------|------------------|---------------------|-----------------------------|--------------------------------|
| II                    | 04 (10.2)        | 18 (81.9)           | 31 (79.5)                   | 16 (72.7)                      |
| ID                    | 03 (7.7)         | 02 (9)              | 04 (10.2)                   | 05 (22.7)                      |
| DD                    | 32 (82)          | 02 (9)              | 04 (10.2)                   | 01 (4.5)                       |
| I                     | 11 (14.1)        | 38 (86.3)           | 66 (84.6)                   | 37 (84.1)                      |
| D                     | 67 (85.9)        | 06 (13.7)           | 12 (15.4)                   | 07 (15.9)                      |

**Table 4:** Statistical analysis for G6PD individuals

| S.No | Genotypes   | ACE                                             | $\alpha_2B$ AR                         |
|------|-------------|-------------------------------------------------|----------------------------------------|
| 1    | DD Vs ID+II | <b>OR-45.71;95%CI=8.62-242.3; p&lt;0.0001</b>   | OR-2.4;95%CI=0.2512-22.93; p=0.4349    |
| 2    | ID+DD Vs II | <b>OR-39.38;95%CI=8.80-176.1; p&lt;0.0001</b>   | OR-0.6882;95%CI=0.2035-2.327; p=0.5466 |
| 3    | ID Vs II+DD | OR-0.833;95%CI=0.12-5.411; p=0.84               | OR-0.3886;95%CI=0.0092-1.635; p=0.1875 |
| 4    | D Vs I      | <b>OR-38.58;95%CI=-13.21-112.6; p&lt;0.0001</b> | OR-0.9614;95%CI=0.3482-2.653; p=0.9388 |
